# Supplementary material for: Effect of MHC Linked 7-Gene Signature on Delayed Hepatocellular Carcinoma Recurrence
Source: MDPI journal article supplement (doi:10.3390/jpm11111129), 2021-11-02

## 1A. Discovery and Validation datasets of HLA-DMA

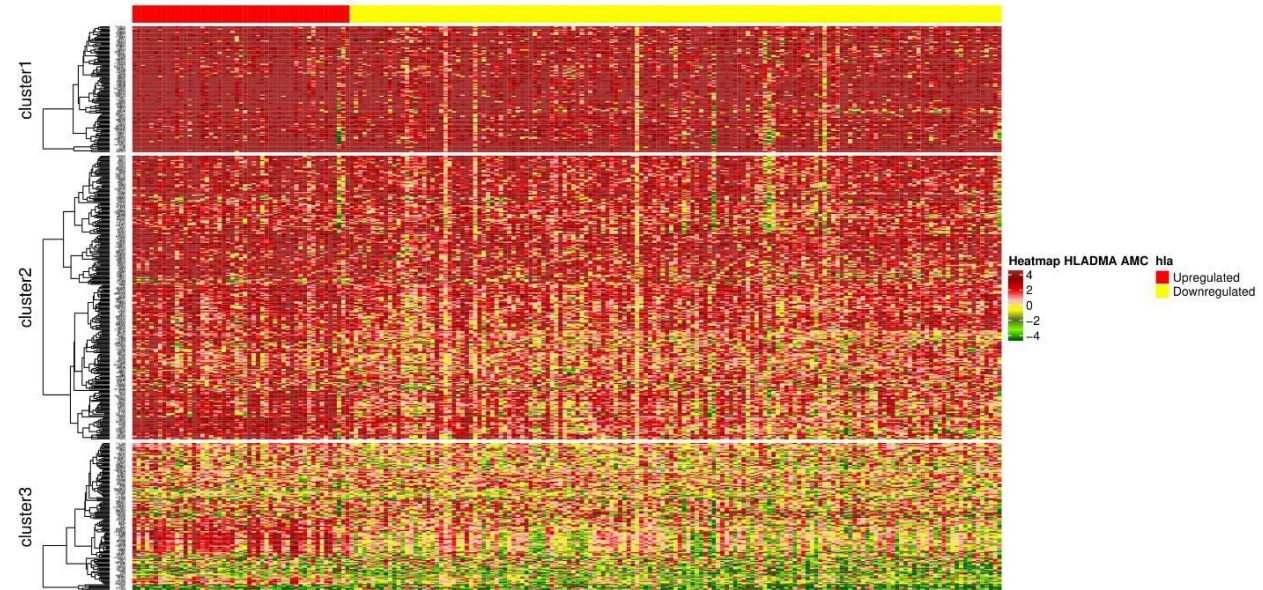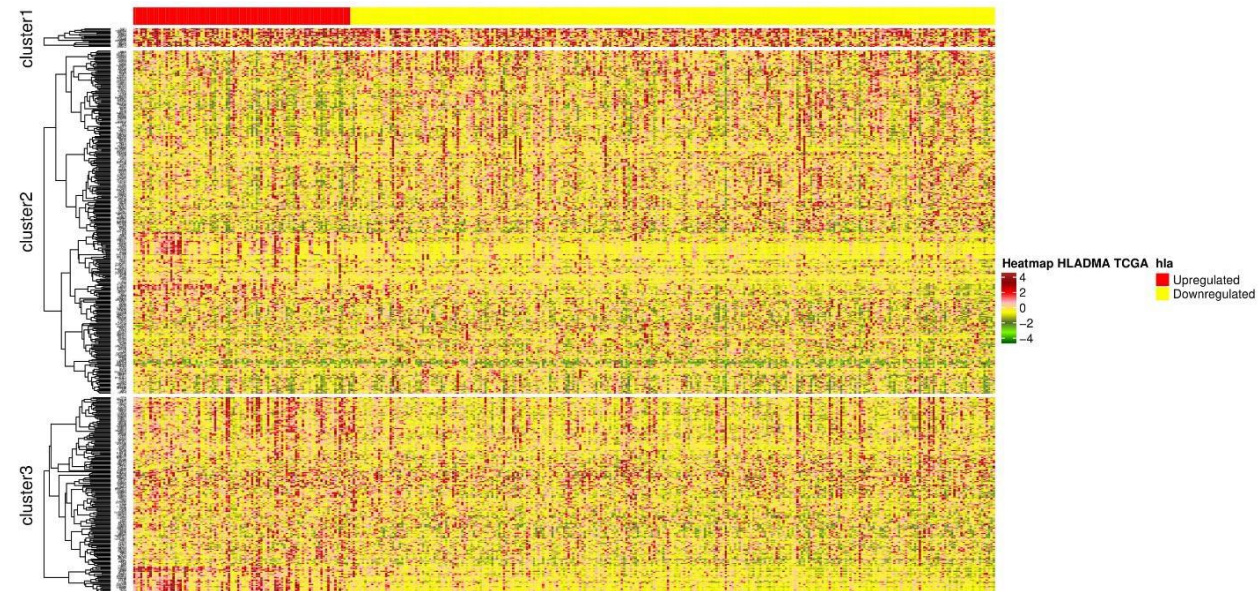



## 1B. Discovery and Validation datasets of HLA-DMB

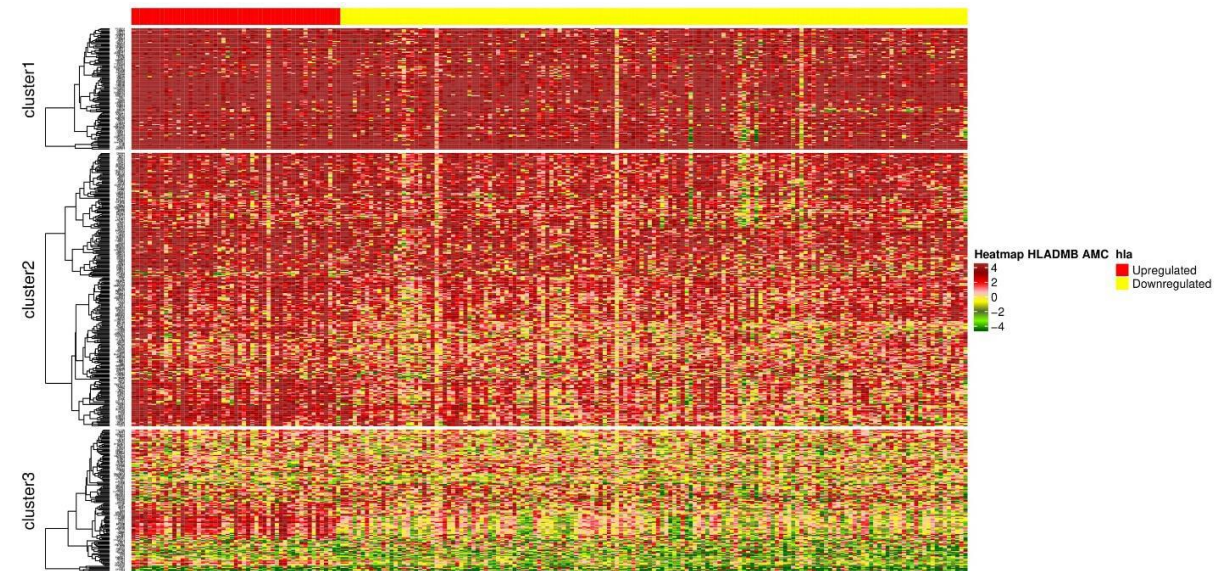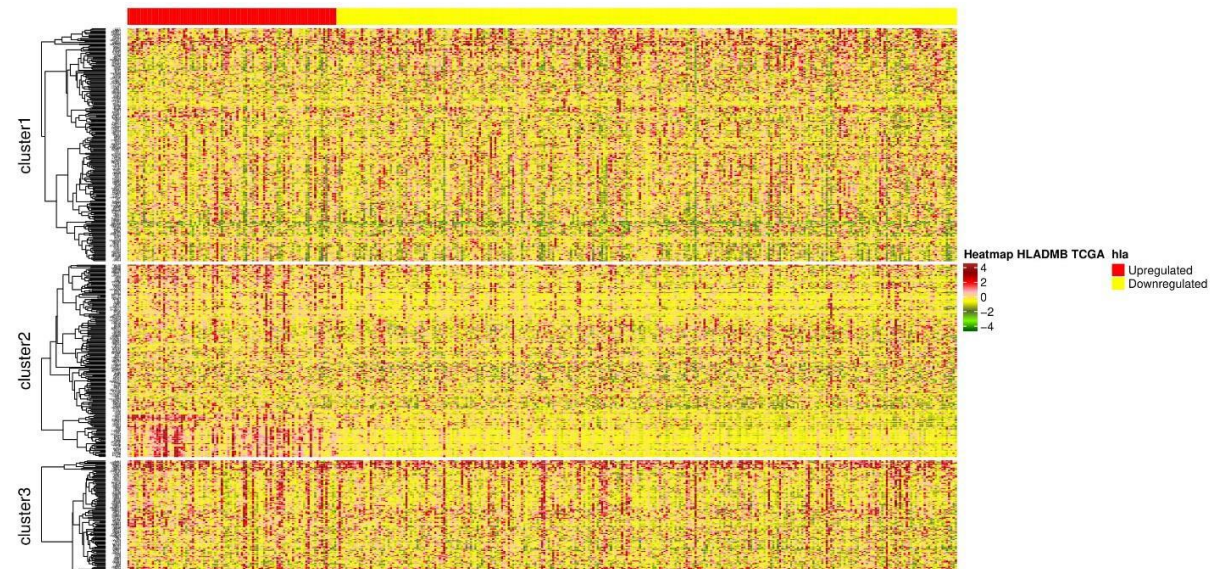



## 1C. Discovery and Validation datasets of HLA-DOA

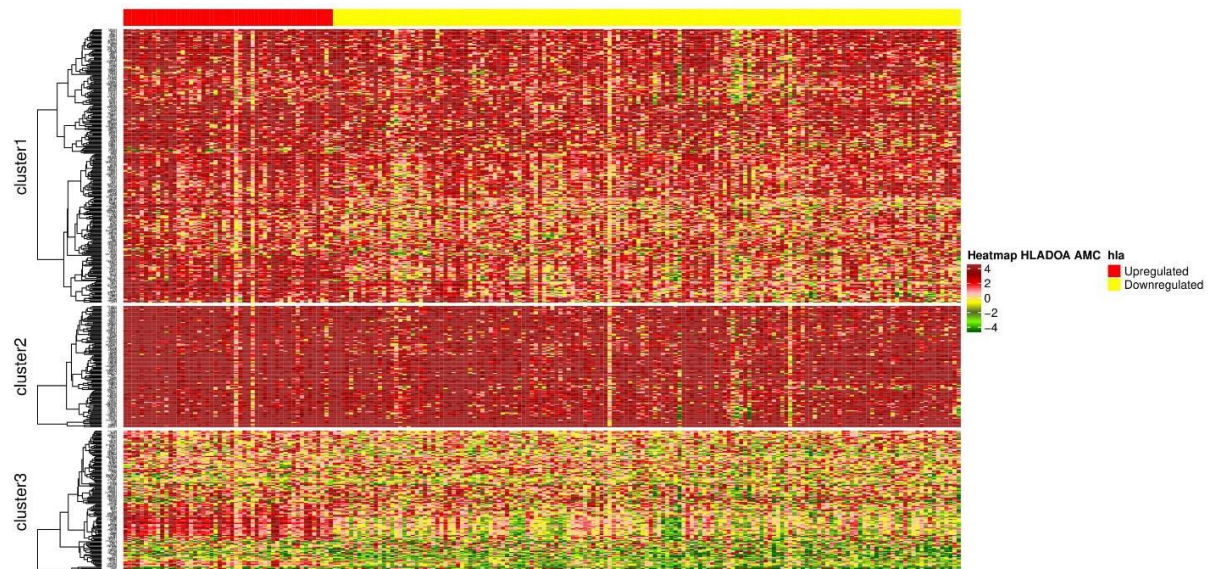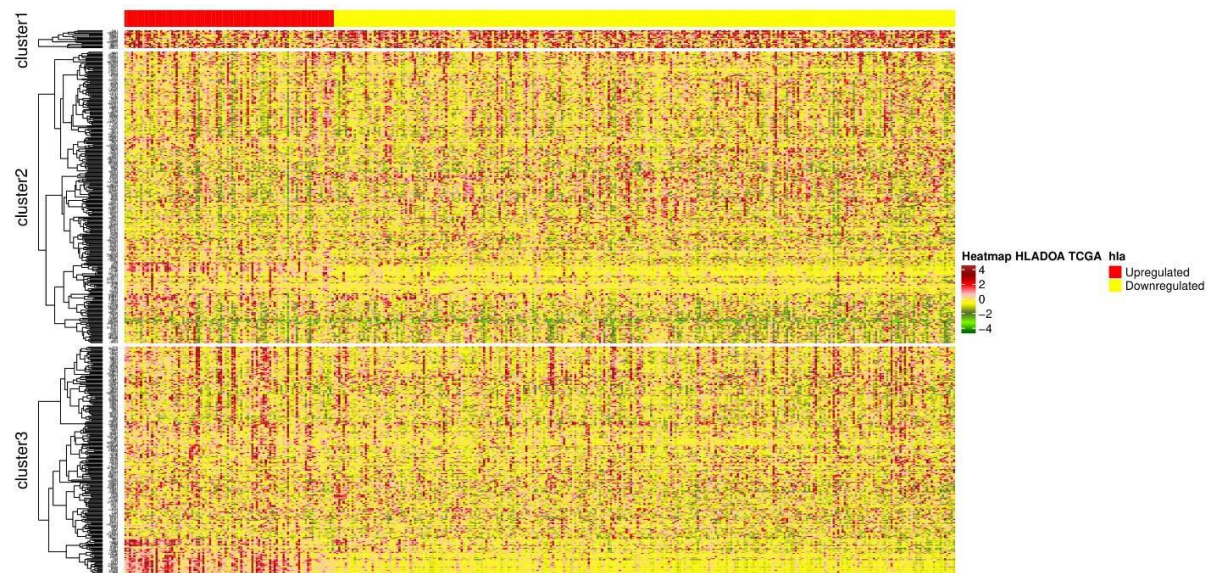



## 1C. Discovery and Validation datasets of HLA-DRB6

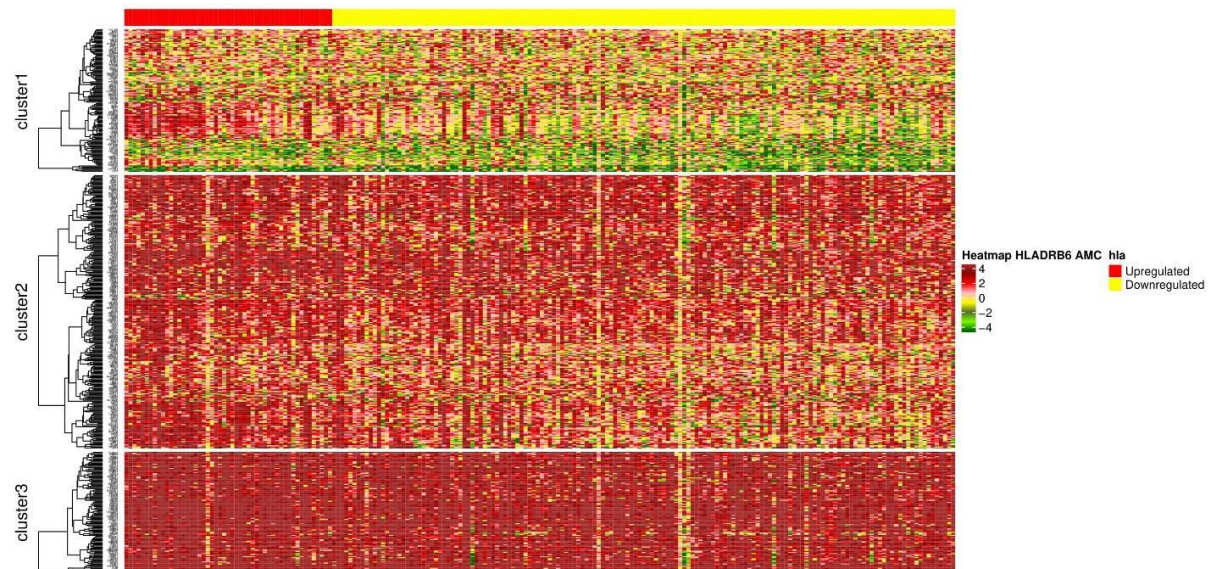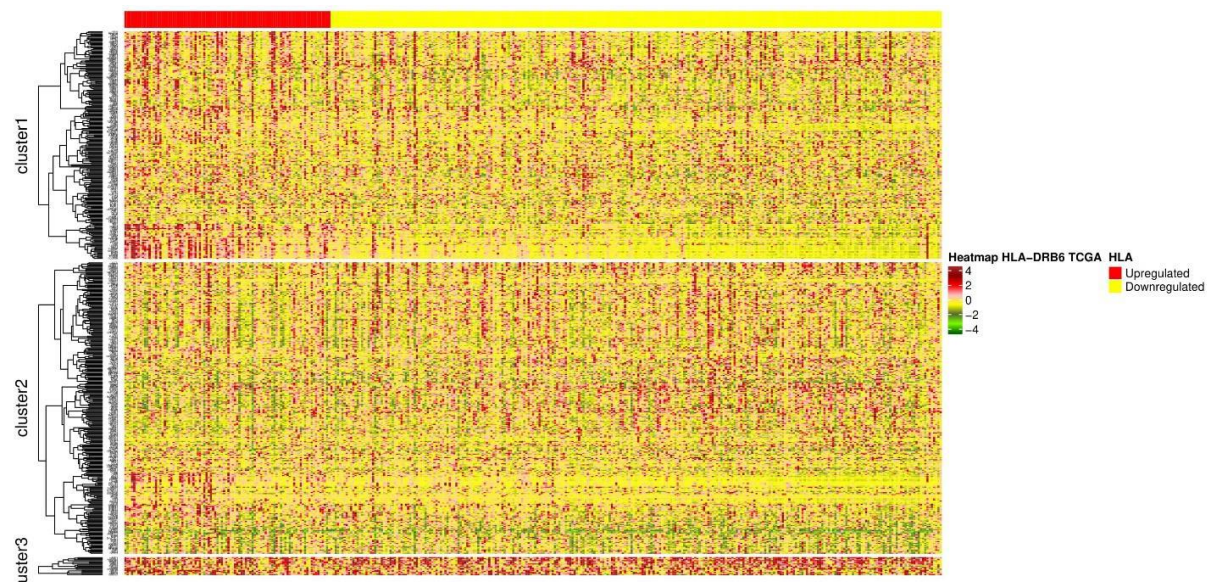



## 1C. Discovery and Validation datasets of HLA-E

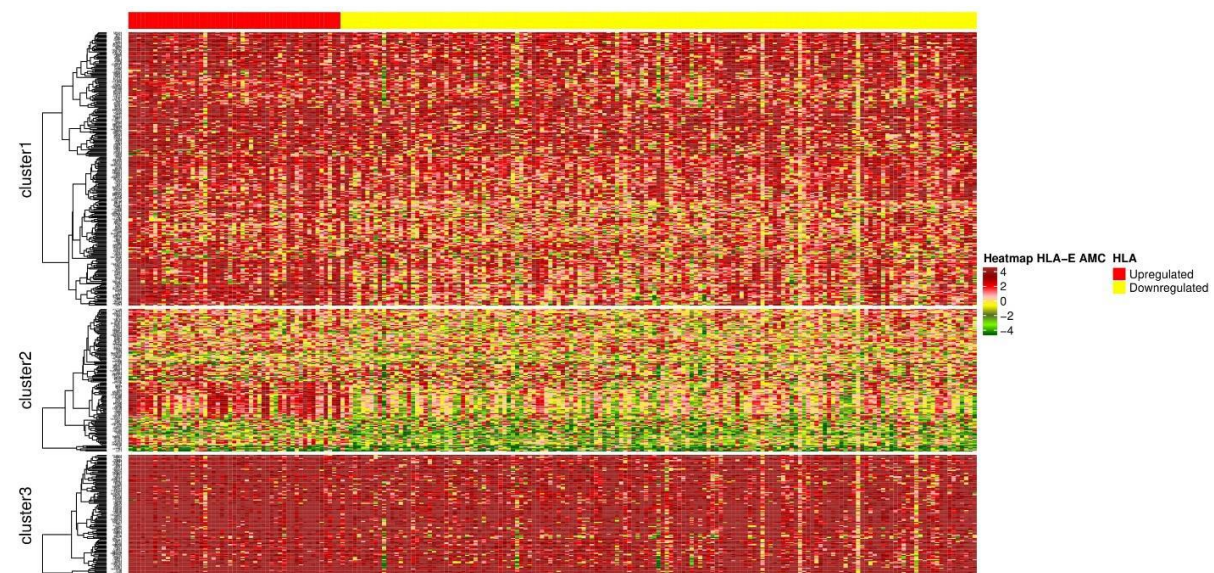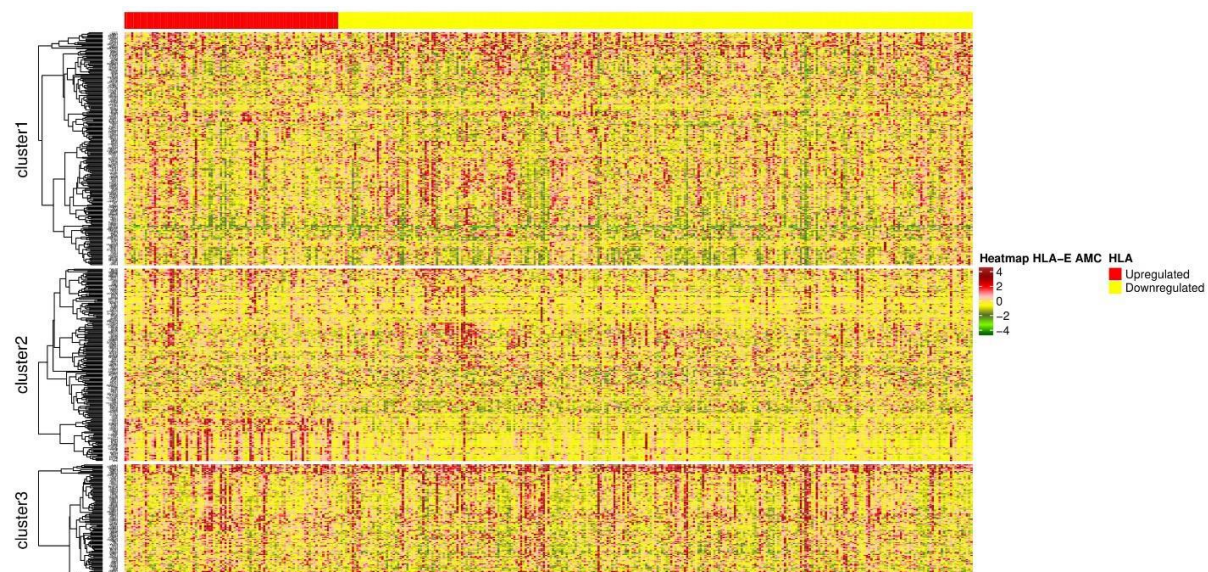

Supplement: s1 [file s1]
