# Supplementary material for: Effect of MHC Linked 7-Gene Signature on Delayed Hepatocellular Carcinoma Recurrence
Source: MDPI journal article supplement (doi:10.3390/jpm11111129), 2021-11-02
Supplement: s1 [file s1]

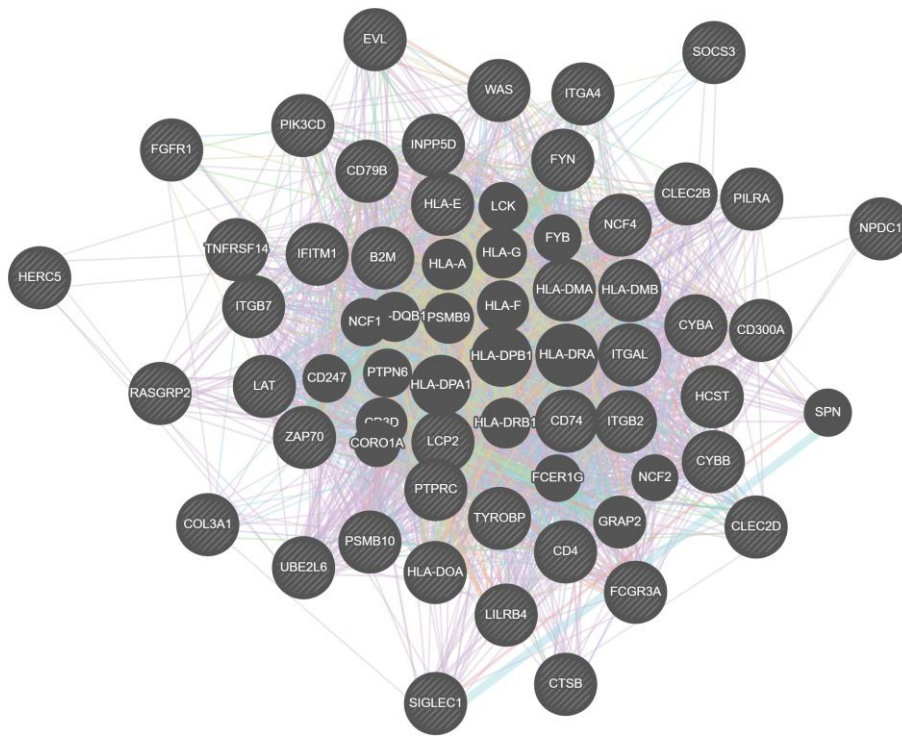

| Networks                                                   |        |
|------------------------------------------------------------|--------|
| <input checked="" type="checkbox"/> Co-expression          | 72.63% |
| <input checked="" type="checkbox"/> Physical Interactions  | 6.40%  |
| <input checked="" type="checkbox"/> Genetic Interactions   | 5.60%  |
| <input checked="" type="checkbox"/> Pathway                | 5.12%  |
| <input checked="" type="checkbox"/> Co-localization        | 3.99%  |
| <input checked="" type="checkbox"/> Predicted              | 3.97%  |
| <input checked="" type="checkbox"/> Shared protein domains | 2.30%  |
