# Supplementary material for: Effect of MHC Linked 7-Gene Signature on Delayed Hepatocellular Carcinoma Recurrence
Source: MDPI journal article supplement (doi:10.3390/jpm11111129), 2021-11-02
Supplement: s1 [file s1]

## Supplementary Material

### Supplementary Tables:

**Table S1.** Clinicopathological characteristics of Discovery cohort (204 HCC patients)

| Characteristics                | Total Patients=N=204 |
|--------------------------------|----------------------|
| <b>Diagnosis Age</b>           |                      |
| <60years                       | 139(68.14%)          |
| >=60years                      | 65(31.86%)           |
| <b>Sex</b>                     |                      |
| Female                         | 152(74.51%)          |
| Male                           | 52(25.49%)           |
| <b>HBV vs non-HBV</b>          |                      |
| HBV                            | 148(72.55%)          |
| non-HBV                        | 56(27.45%)           |
| <b>Tumor size</b>              |                      |
| <=5                            | 142(69.61%)          |
| >5                             | 62(30.39%)           |
| <b>Edmonson most Grade</b>     |                      |
| <=2                            | 130(63.73%)          |
| >2                             | 74(36.27%)           |
| <b>Alpha-fetoprotein level</b> |                      |
| <10                            | 127(62.25%)          |
| >=10                           | 77(37.75%)           |
| <b>Microvascular invasion</b>  |                      |
| No                             | 147(72.06%)          |
| Yes                            | 57(27.94%)           |
| <b>Cirrhosis</b>               |                      |
| No                             | 106(51.96%)          |
| Yes                            | 98(48.04%)           |
| <b>Overall survival</b>        |                      |
| Alive                          | 175(85.78%)          |
| Death                          | 29(14.22%)           |
| <b>Disease Free survival</b>   |                      |
| Disease Free                   | 118(57.84%)          |
| Recurrence                     | 86(42.16%)           |

**Table S2.** Clinicopathological characteristics of Validation cohort (372 HCC patients)

| <b>Characteristics</b>         | <b>Total patients=N=372</b> |
|--------------------------------|-----------------------------|
| <b>Diagnosis Age</b>           |                             |
| <60years                       | 169(45.43%)                 |
| >=60years                      | 203(54.57%)                 |
| <b>Sex</b>                     |                             |
| Female                         | 121(32.53%)                 |
| Male                           | 251(67.47%)                 |
| <b>HBV</b>                     |                             |
| No                             | 248(66.67%)                 |
| Yes                            | 105(28.23%)                 |
| NA                             | 19                          |
| <b>HCV</b>                     |                             |
| No                             | 297(79.84%)                 |
| Yes                            | 56(15.05%)                  |
| NA                             | 19                          |
| <b>HBV or HCV</b>              |                             |
| No                             | 199(53.49%)                 |
| Yes                            | 154(41.40%)                 |
| NA                             | 19                          |
| <b>HBV and HCV</b>             |                             |
| No                             | 346(93.01%)                 |
| Yes                            | 7(1.88%)                    |
| NA                             | 19                          |
| <b>Alcohol consumption</b>     |                             |
| No                             | 236(63.44%)                 |
| Yes                            | 117(31.45%)                 |
| NA                             | 19                          |
| <b>Grade</b>                   |                             |
| G1-G2                          | 233(62.63%)                 |
| G3-G4                          | 134(36.02%)                 |
| NA                             | 5                           |
| <b>T stage</b>                 |                             |
| T1-T2                          | 276(74.19%)                 |
| T3-T4                          | 93(25%)                     |
| NA                             | 3                           |
| <b>Residual tumor</b>          |                             |
| R0                             | 325(87.37%)                 |
| R1-R2                          | 18(4.84%)                   |
| NA                             | 29                          |
| <b>Alpha-fetoprotein level</b> |                             |
| <200                           | 202(54.30%)                 |
| >=200                          | 76(20.43%)                  |
| NA                             | 94                          |
| <b>Node stage</b>              |                             |

|                               |             |
|-------------------------------|-------------|
| N0                            | 253(68.01%) |
| N1                            | 4(1.07%)    |
| NA                            | 115         |
| <b>Metastasis stage</b>       |             |
| M0                            | 267(71.77%) |
| M1                            | 4(1.08%)    |
| NA                            | 101         |
| <b>Tumor stage</b>            |             |
| Stage I-II                    | 258(69.35%) |
| Stage III-IV                  | 90(24.19%)  |
| NA                            | 24          |
| <b>Microvascular invasion</b> |             |
| No                            | 16(4.30%)   |
| Yes                           | 93(25%)     |
| NA                            | 263         |
| <b>Macrovascular invasion</b> |             |
| No                            | 93(25%)     |
| Yes                           | 16(4.30%)   |
| NA                            | 263         |
| <b>Cirrhosis</b>              |             |
| Fibrosis                      | 68(18.28%)  |
| Cirrhosis                     | 70(18.81%)  |
| NA                            | 234         |
| <b>Overall survival</b>       |             |
| Alive                         | 242(65.05%) |
| Death                         | 130(34.95%) |
| <b>Disease free survival</b>  |             |
| Disease free                  | 145(38.98%) |
| Recurrence                    | 176(47.31%) |
| NA                            | 51          |

\*NA = Not Available

**Table S3.** Association of expression of HLA genes with clinical features in Discovery cohort

| Gene ID         | Sex | Age | Tumor size | HBV vs non-HBV | Edmonson most grade | Cirrhosis | Alpha-fetoprotein in level | Microvascular | Kaplan-Meier overall | Kaplan-Meier disease |
|-----------------|-----|-----|------------|----------------|---------------------|-----------|----------------------------|---------------|----------------------|----------------------|
| <i>HLA-A</i>    | NA  | NA  | NA         | NA             | NA                  | NA        | NA                         | NA            | NA                   | NA                   |
| <i>HLA-B</i>    | NA  | NA  | NA         | NA             | NA                  | NA        | NA                         | NA            | NA                   | NA                   |
| <i>HLA-C</i>    |     | NA  | NA         | NA             |                     | NA        |                            | NA            | NA                   | NA                   |
| <i>HLA-DMA</i>  | NA  | NA  | NA         | NA             | NA                  | NA        | NA                         | NA            | NA                   |                      |
| <i>HLA-DMB</i>  | NA  |     | NA         | NA             | NA                  | NA        | NA                         | NA            | NA                   |                      |
| <i>HLA-DOA</i>  |     | NA  | NA         | NA             | NA                  | NA        | NA                         | NA            | NA                   |                      |
| <i>HLA-DOB</i>  | NA  | NA  | NA         | NA             |                     |           | NA                         | NA            | NA                   |                      |
| <i>HLA-DPA1</i> | NA  |     | NA         | NA             | NA                  | NA        | NA                         | NA            | NA                   | NA                   |
| <i>HLA-DPB1</i> | NA  |     | NA         | NA             | NA                  | NA        | NA                         | NA            | NA                   |                      |
| <i>HLA-DPB2</i> | NA  | NA  | NA         | NA             | NA                  | NA        | NA                         | NA            | NA                   | NA                   |
| <i>HLA-DQA1</i> | NA  | NA  | NA         | NA             | NA                  |           | NA                         | NA            | NA                   | NA                   |
| <i>HLA-DQA2</i> | NA  |     |            | NA             |                     | NA        | NA                         | NA            |                      |                      |
| <i>HLA-DQB1</i> | NA  | NA  | NA         | NA             | NA                  | NA        | NA                         | NA            | NA                   | NA                   |
| <i>HLA-DQB2</i> | NA  |     |            | NA             |                     | NA        | NA                         | NA            | NA                   |                      |
| <i>HLA-DRA</i>  | NA  |     | NA         | NA             | NA                  | NA        | NA                         | NA            | NA                   | NA                   |
| <i>HLA-DRB1</i> | NA  | NA  | NA         | NA             | NA                  |           | NA                         | NA            | NA                   | NA                   |
| <i>HLA-DRB6</i> | NA  |     |            | NA             | NA                  | NA        | NA                         |               | NA                   |                      |
| <i>HLA-E</i>    | NA  | NA  | NA         |                |                     | NA        | NA                         | NA            | NA                   |                      |
| <i>HLA-F</i>    | NA  | NA  | NA         | NA             | NA                  |           | NA                         | NA            | NA                   | NA                   |
| <i>HLA-G</i>    |     | NA  | NA         | NA             | NA                  | NA        |                            | NA            |                      |                      |
| <i>HLA-H</i>    | NA  | NA  | NA         | NA             | NA                  | NA        | NA                         | NA            | NA                   | NA                   |
| <i>HLA-J</i>    | NA  | NA  | NA         | NA             | NA                  | NA        | NA                         | NA            | NA                   | NA                   |
| <i>HLA-L</i>    |     | NA  |            | NA             | NA                  | NA        | NA                         | NA            | NA                   | NA                   |

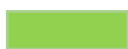

Upregulation in Female, age&lt;60, non-HBV, no Cirrhosis

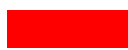

Upregulation in Male. Advance grade stage. Tumor size&gt;=5. High Alpha-fetoprotein level

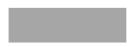

Upregulation in no Microvascular invasion, Tumor size&lt;5, Good survival,

**Table S4.** Association of expression of HLA genes with clinical features in Validation cohort

| Gene ID         | Age | Sex | Grade | HBV | HCV | HBV or HCV | HBV and HCV | Alpha-fetoprotein | Alcohol consumption | Cirrhosis | Tumor stage | T stage | Kaplan-Meier overall | Kaplan-Meier disease free |
|-----------------|-----|-----|-------|-----|-----|------------|-------------|-------------------|---------------------|-----------|-------------|---------|----------------------|---------------------------|
| <i>HLA-C</i>    | NA  |     | NA    | NA  |     | NA         | NA          |                   |                     |           | NA          | NA      | NA                   | NA                        |
| <i>HLA-DMA</i>  | NA  | NA  | NA    | NA  | NA  | NA         | NA          | NA                |                     | NA        | NA          | NA      | NA                   |                           |
| <i>HLA-DMB</i>  | NA  | NA  | NA    | NA  | NA  | NA         | NA          | NA                |                     | NA        | NA          | NA      | NA                   |                           |
| <i>HLA-DOA</i>  | NA  | NA  | NA    | NA  | NA  | NA         | NA          | NA                | NA                  | NA        |             | NA      | NA                   |                           |
| <i>HLA-DOB</i>  | NA  | NA  | NA    | NA  |     |            | NA          | NA                |                     | NA        |             |         | NA                   | NA                        |
| <i>HLA-DPB1</i> | NA  | NA  | NA    | NA  | NA  | NA         | NA          | NA                | NA                  | NA        | NA          | NA      | NA                   | NA                        |
| <i>HLA-DPB2</i> | NA  |     | NA    | NA  | NA  | NA         | NA          |                   | NA                  | NA        | NA          | NA      | NA                   | NA                        |
| <i>HLA-DQA1</i> | NA  | NA  | NA    | NA  | NA  | NA         | NA          | NA                | NA                  | NA        | NA          | NA      | NA                   | NA                        |
| <i>HLA-DQA2</i> | NA  | NA  |       | NA  |     | NA         | NA          | NA                | NA                  | NA        |             |         | NA                   | NA                        |
| <i>HLA-DQB1</i> | NA  | NA  | NA    | NA  | NA  | NA         | NA          | NA                | NA                  | NA        | NA          | NA      | NA                   | NA                        |
| <i>HLA-DQB2</i> | NA  | NA  | NA    | NA  | NA  | NA         | NA          | NA                | NA                  | NA        | NA          | NA      | NA                   | NA                        |
| <i>HLA-DRA</i>  | NA  | NA  | NA    | NA  | NA  | NA         | NA          | NA                | NA                  | NA        |             | NA      | NA                   |                           |
| <i>HLA-DRB1</i> | NA  | NA  | NA    | NA  |     | NA         | NA          | NA                |                     | NA        | NA          | NA      | NA                   |                           |
| <i>HLA-DRB6</i> | NA  | NA  | NA    | NA  | NA  | NA         | NA          | NA                | NA                  | NA        | NA          | NA      | NA                   |                           |
| <i>HLA-DRB5</i> | NA  | NA  | NA    | NA  |     | NA         | NA          | NA                |                     | NA        | NA          | NA      | NA                   | NA                        |
| <i>HLA-E</i>    | NA  | NA  |       |     |     | NA         | NA          |                   |                     | NA        | NA          |         |                      |                           |
| <i>HLA-F</i>    |     | NA  | NA    | NA  |     | NA         |             |                   | NA                  | NA        |             |         | NA                   | NA                        |
| <i>HLA-G</i>    | NA  | NA  | NA    | NA  |     |            | NA          | NA                | NA                  | NA        | NA          |         | NA                   | NA                        |
| <i>HLA-H</i>    |     |     | NA    | NA  |     |            | NA          | NA                | NA                  | NA        |             |         |                      | NA                        |

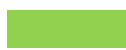

Upregulation in Female Initial grade stage,, non-HBV, non-HBV, no Cirrhosis, Initial T stage, , Low Alpha-fetoprotein level, non-HCV

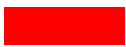

Upregulation in Male, age>=60, Advance grade stage, HCV, Alcohol consumption, HBV or HCV, High Alpha-fetoprotein level, HBV and HCV

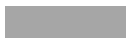

Upregulation in Initial tumor stage, Good survival, Delayed recurrence

NA: No Association

**Table S5.** MHC gene and their correlated gene list

| MHC Gene name   | Correlated Genes                                                                                                                                                                                                                                             |
|-----------------|--------------------------------------------------------------------------------------------------------------------------------------------------------------------------------------------------------------------------------------------------------------|
| <b>HLA-DMA</b>  | CD300A, CD74, CD79B, CLEC2B,<br>CYBA, HCST, IFITM1, LAT, LILRB4,<br>NCF4, NPDC1, PILRA, PSMB10,<br>RASGRP2, SIGLEC1, TYROBP,<br>UBE2L6, WAS and TNFRSF14                                                                                                     |
| <b>HLA-DMB</b>  | B2M, CD300A, CD4, CD74, CD79B, CLEC2B, CLEC2D, COL3A1,<br>CYBA, CYBB, EVL, FCGR3A, FYN, HCST, IFITM1, INPP5D, ITGA4,<br>ITGAL, ITGB2, ITGB7, LAT, LCP2, LILRB4, NCF4, NPDC1, PIK3CD,<br>PILRA, PTPRC, RASGRP2, SIGLEC1, SOCS3, TYROBP, UBE2L6, WAS,<br>ZAP70 |
| <b>HLA-DOA</b>  | B2M, CD300A, CD74, CD79B, CLEC2B,<br>CYBA, EVL, FCGR3A, HCST, IFITM1, ITGAL,<br>ITGB2, LAT, LILRB4, NCF4, NPDC1, PIK3CD,<br>PILRA, PSMB10, RASGRP2, SIGLEC1, TYROBP,<br>UBE2L6, WAS, ZAP70                                                                   |
| <b>HLA-DRB6</b> | B2M, CD300A, CD74, CD79B, CLEC2B,<br>CYBA, FCGR3A, HCST, IFITM1, ITGAL,<br>ITGB2, LILRB4, NCF4, PIK3CD, PILRA,<br>PSMB10, RASGRP2, SIGLEC1, TYROBP,<br>UBE2L6, WAS, ZAP70                                                                                    |
| <b>HLA-E</b>    | B2M, CD74, UBE2L6, WAS, ITGB2,<br>LCP2, PTPRC, PILRA, SIGLEC1, CYBB, FCGR3A,<br>LILRB4, HERC5, IFITM1, NCF4, HCST, TYROBP,<br>PIK3CD, CLEC2B, ZAP70, ITGA4, FYN, INPP5D,<br>ITGAL, CD300A, CTSB, CD4, ITGB7, EVL, CD79B,<br>SOCS3                            |

**Table S6.** Gene name and chromosomal location of 40 unique genes

| HGNC symbol | Chromosome location | Gene description                                                       |
|-------------|---------------------|------------------------------------------------------------------------|
| B2M         | 15q21.1             | beta-2-microglobulin                                                   |
| CD300A      | 17q25.1             | CD300a molecule                                                        |
| CD4         | 12p13.31            | CD4 molecule                                                           |
| CD74        | 5q33.1              | CD74 molecule                                                          |
| CD79B       | 17q23.3             | CD79b molecule                                                         |
| CLEC2B      | 12p13.31            | C-type lectin domain family 2 member B                                 |
| CLEC2D      | 12p13.31            | C-type lectin domain family 2 member D                                 |
| COL3A1      | 2q32.2              | collagen type III alpha 1 chain                                        |
| CTSB        | 21q22.3             | cathepsin B                                                            |
| CYBA        | 16q24.2             | cytochrome b-245 alpha chain                                           |
| CYBB        | Xp21.1-p11.4        | cytochrome b-245 beta chain                                            |
| EVL         | 14q32.2             | Enah/Vasp-like                                                         |
| FCGR3A      | 1q23.3              | Fc fragment of IgG receptor IIIa                                       |
| FGFR1       | 8p11.23             | fibroblast growth factor receptor 1                                    |
| FYN         | 6q21                | FYN proto-oncogene, Src family tyrosine kinase                         |
| HCST        | 19q13.12            | hematopoietic cell signal transducer                                   |
| HERC5       | 4q22.1              | HECT and RLD domain containing E3 ubiquitin protein ligase 5           |
| IFITM1      | 11p15.5             | interferon induced transmembrane protein 1                             |
| INPP5D      | 2q37.1              | inositol polyphosphate-5-phosphatase D                                 |
| ITGA4       | 2q31.3              | integrin subunit alpha 4                                               |
| ITGAL       | 16p11.2             | integrin subunit alpha L                                               |
| ITGB2       | 21q22.3             | integrin subunit beta 2                                                |
| ITGB7       | 12q13.13            | integrin subunit beta 7                                                |
| LAT         | 16p11.2             | linker for activation of T cells                                       |
| LCP2        | 5q35.1              | lymphocyte cytosolic protein 2                                         |
| LILRB4      | 19q13.4             | leukocyte immunoglobulin like receptor B4                              |
| NCF4        | 22q12.3             | neutrophil cytosolic factor 4                                          |
| NPDC1       | 9q34.3              | neural proliferation, differentiation and control 1                    |
| PIK3CD      | 1p36.22             | phosphatidylinositol-4,5-bisphosphate 3-kinase catalytic subunit delta |
| PILRA       | 7q22.1              | paired immunoglobulin like type 2 receptor alpha                       |
| PSMB10      | 16q22.1             | proteasome subunit beta 10                                             |
| PTPRC       | 1q31.3              | protein tyrosine phosphatase receptor type C                           |
| RASGRP2     | 11q13.1             | RAS guanyl releasing protein 2                                         |
| SIGLEC1     | 20p13               | sialic acid binding Ig like lectin 1                                   |
| SOCS3       | 17q25.3             | suppressor of cytokine signaling 3                                     |
| TNFRSF14    | 1p36.32             | TNF receptor superfamily member 14                                     |
| TYROBP      | 19q13.12            | TYRO protein tyrosine kinase binding protein                           |
| UBE2L6      | 11q12.1             | ubiquitin conjugating enzyme E2 L6                                     |

|       |         |                                                            |
|-------|---------|------------------------------------------------------------|
| WAS   | Xp11.23 | WASP actin nucleation promoting factor                     |
| ZAP70 | 2q11.2  | zeta chain of T cell receptor associated protein kinase 70 |
