# Supplementary material for: Effect of MHC Linked 7-Gene Signature on Delayed Hepatocellular Carcinoma Recurrence
Source: J Pers Med. 2021 Nov 2;11(11):1129. doi: 10.3390/jpm11111129 (PMC8625636; doi:10.3390/jpm11111129)
Supplement: Supplementary file 1 [file jpm-11-01129-s001.zip]

Archive with 4 entries (4 files):
- Figure S1.pdf
- Figure S2.pdf
- Figure S3.pdf
- jpm-1407072-supplementary.pdf
