# Supplementary figures and images for: Effect of MHC Linked 7-Gene Signature on Delayed Hepatocellular Carcinoma Recurrence
Source: MDPI journal article supplement (doi:10.3390/jpm11111129), 2021-11-02

Degree Measure

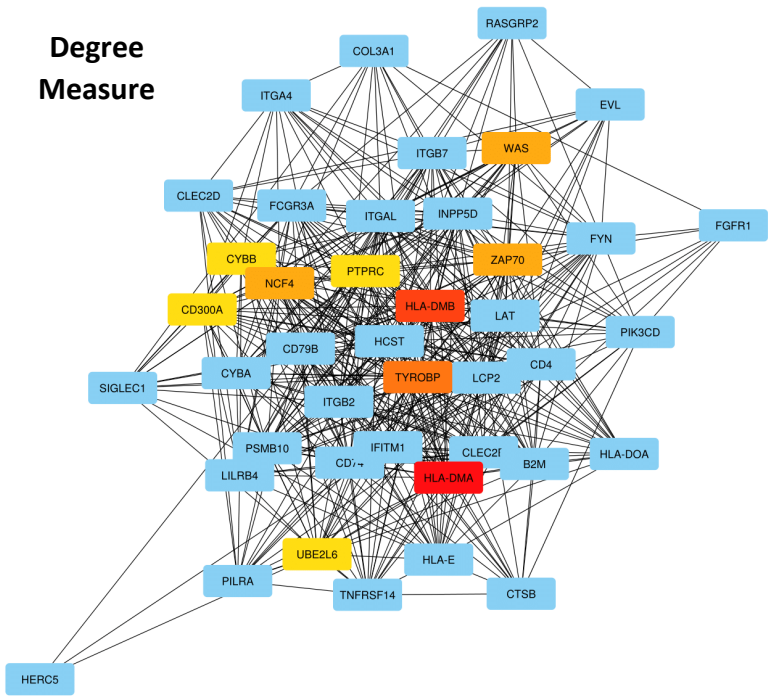

MCC Measure

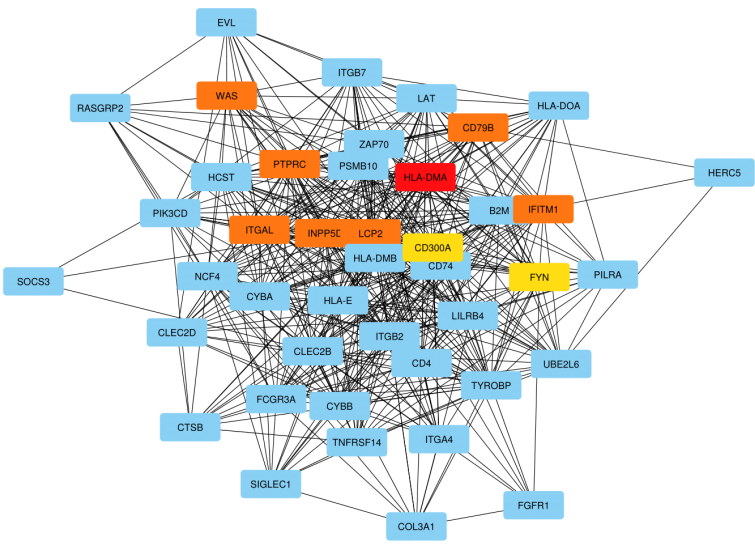

Betweenness Measure

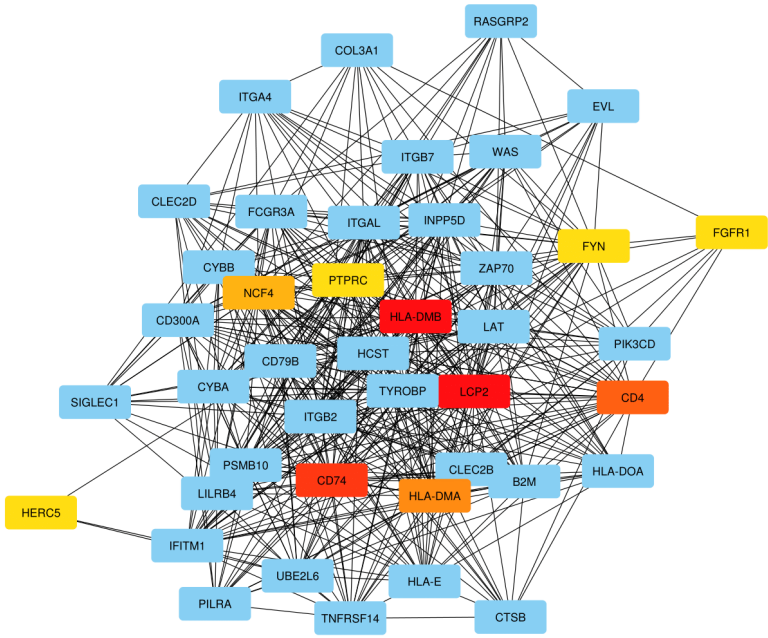

Closeness Measure

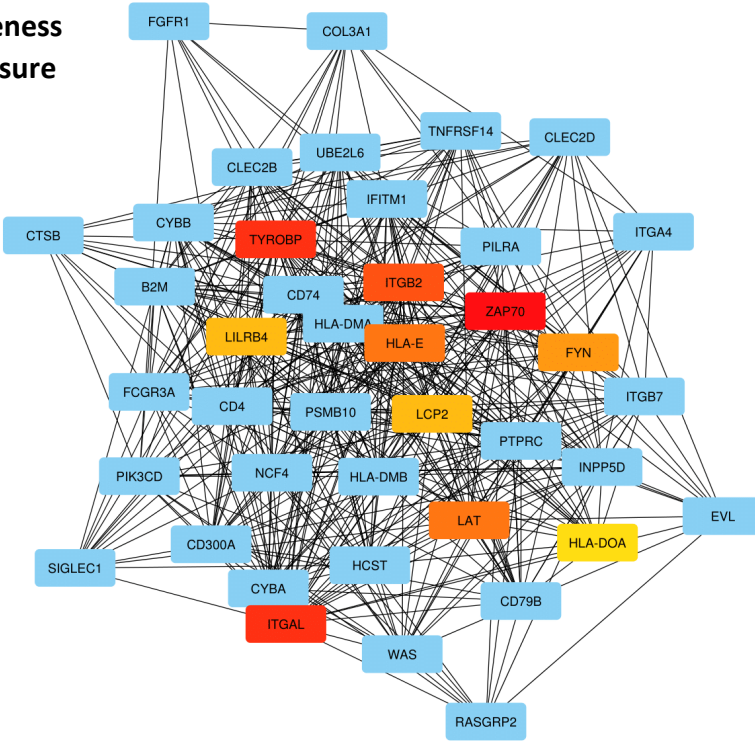

Bottleneck Measure

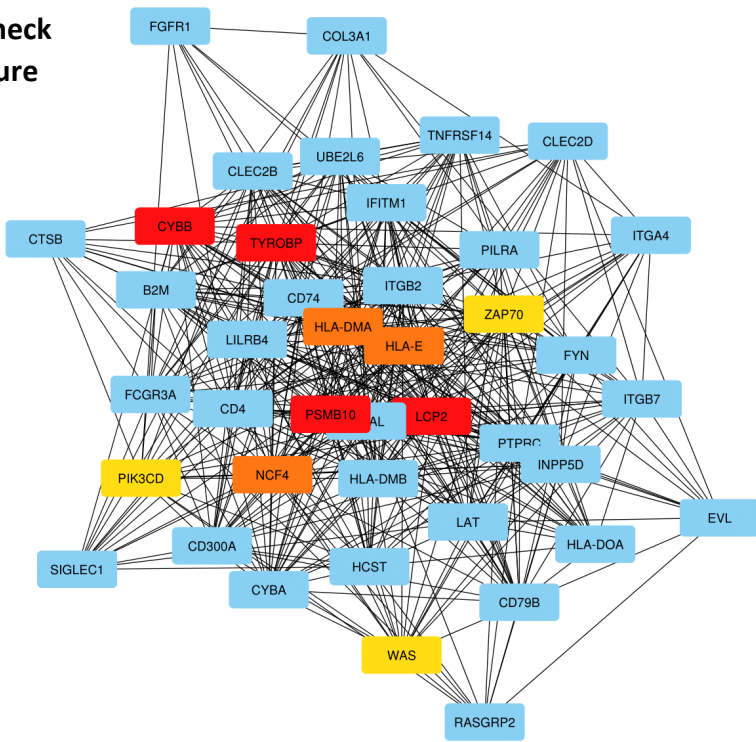

Supplement: s1 [file s1]
